# Supplementary material
Source: publisher figshare collection journal article supplement (https://acs.figshare.com/ndownloader/files/20039972)
Supplement: Supplementary file 1 [file 20039972]

## Supporting Information

# Covalent Organic Framework Films through Electrophoretic Deposition - Creating Efficient Morphologies for Catalysis

Julian M. Rotter,<sup>a</sup> Simon Weinberger,<sup>a</sup> Jonathan Kampmann,<sup>a</sup> Torben Sick,<sup>a</sup> Menny Shalom,<sup>b</sup> Thomas Bein<sup>a</sup> and Dana D. Medina<sup>a,\*</sup>

<sup>a</sup> Department of Chemistry and Center for NanoScience (CeNS), University of Munich (LMU), Butenandtstr. 5-13, 81377 Munich, Germany

<sup>b</sup> Department of Chemistry and Ilse Katz Institute for Nanoscale Science and Technology, Ben-Gurion University of the Negev Beer-Sheva 8410501, Israel

## Table of Contents

|                                                                          |    |
|--------------------------------------------------------------------------|----|
| Deposition of BDT-ETTA COF on FTO, ITO and titanium foil .....           | 2  |
| Deposition of BDT-ETTA COF in anisole, ethyl acetate and toluene.....    | 2  |
| DLS Data for ultrasound treated BDT-ETTA COF COF .....                   | 3  |
| Transmission electron micrographs .....                                  | 4  |
| COF EPD film physisorption .....                                         | 6  |
| Fourier-transform infrared spectroscopy .....                            | 7  |
| BDT-ETTA COF time-dependent thickness plot .....                         | 8  |
| Voltage dependent deposition of BDT-ETTA.....                            | 9  |
| Mass-dependent deposition of COF-300.....                                | 9  |
| Large area deposition of BDT-ETTA COF.....                               | 10 |
| SEM Micrographs of BDT-ETTA COF deposited on a porous mesh .....         | 10 |
| Thickness dependent PEC current measurements and chronoamperometry ..... | 11 |
| Stability of BDT-ETTA COF after PEC catalysis.....                       | 11 |
| Pt nanoparticles size characterization .....                             | 12 |

### Deposition of BDT-ETTA COF on FTO, ITO and titanium foil

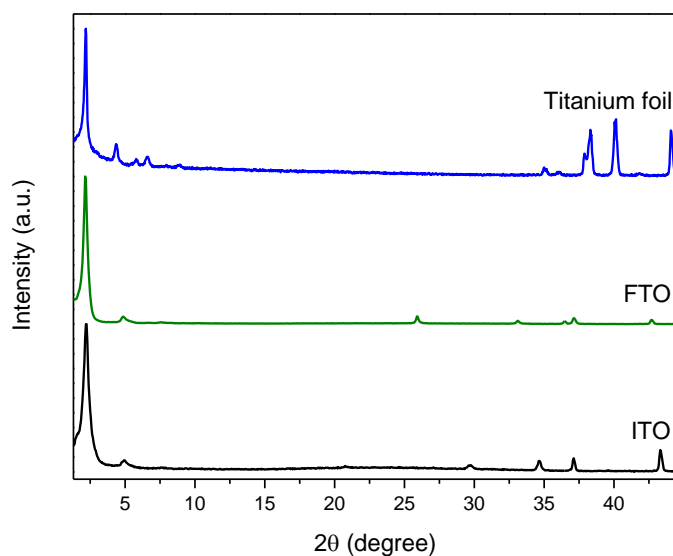

Figure S1: Deposition of BDT-ETTA COF on different conducting surfaces, namely titanium foil, glass coated with FTO and glass coated with ITO. All depositions were carried out using 10 mL of BDT-ETTA COF suspension in ethyl acetate at 900 V for 2 min.

### Deposition of BDT-ETTA COF in anisole, ethyl acetate and toluene

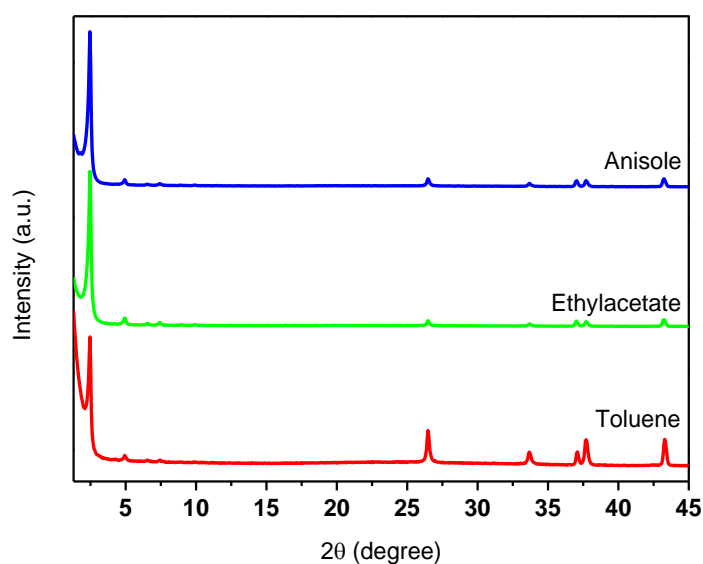

Figure S2: Deposition of BDT-ETTA COF from different solvents, namely anisole, ethyl acetate and toluene. All depositions were carried out using 10 mL of the respective BDT-ETTA COF suspension at 900 V for 2 min.

### DLS Data for ultrasound treated BDT-ETTA COF

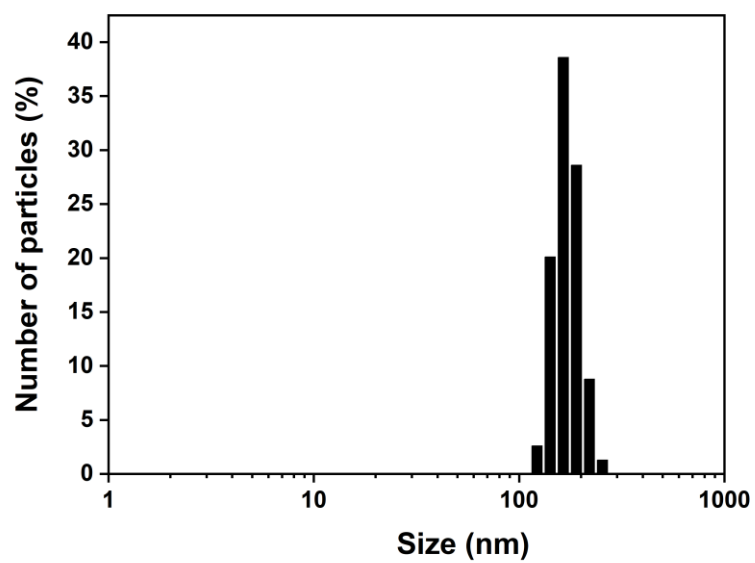

Figure S3: Particle size distribution of BDT-ETTA COF after the ultrasonic milling process.

## Transmission electron micrographs

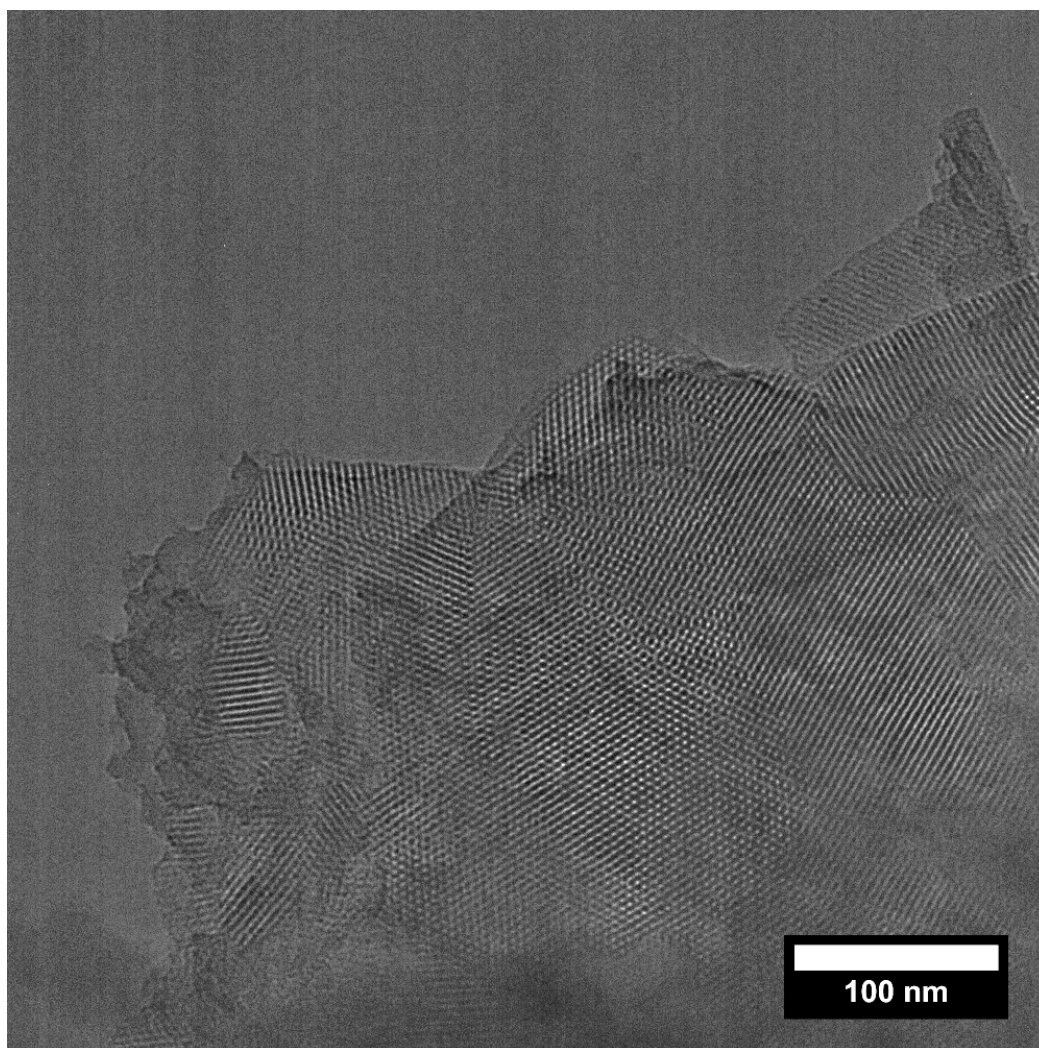

Figure S4: TEM image of deposited BDT-ETTA COF particles after the ultrasonic milling process.

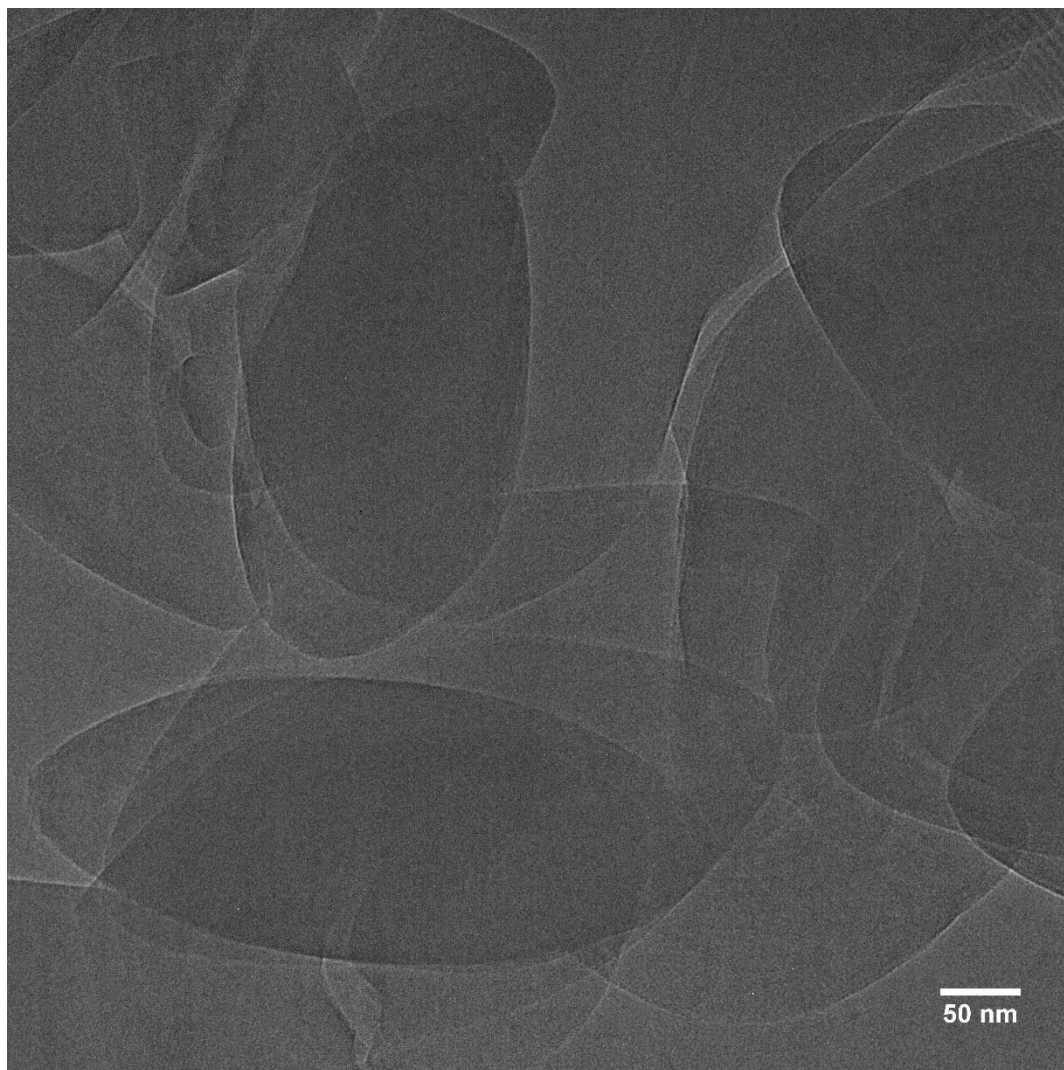

Figure S5: TEM image of deposited COF-300 particles.



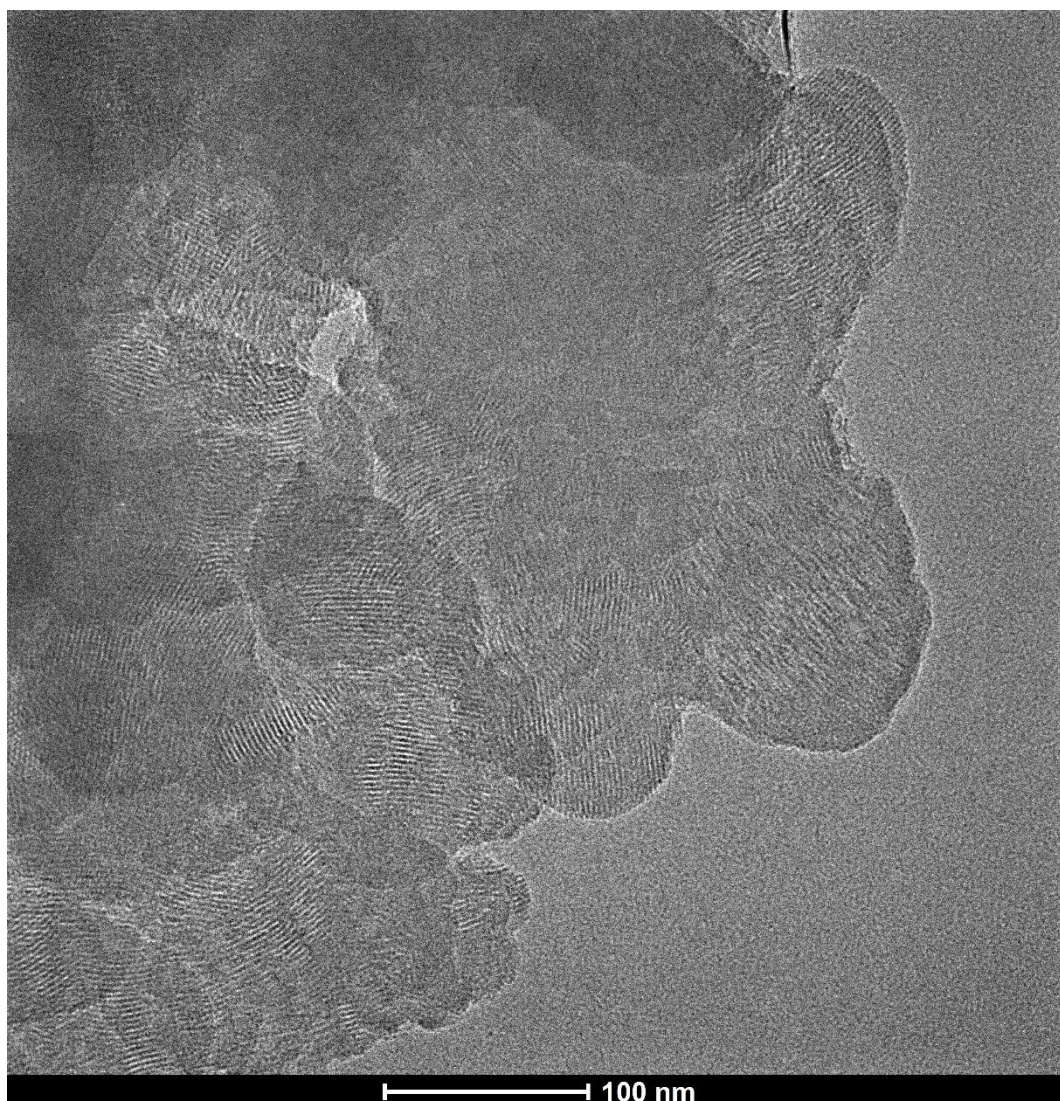

Figure S6: TEM image of deposited COF-5.

## COF EPD film physisorption

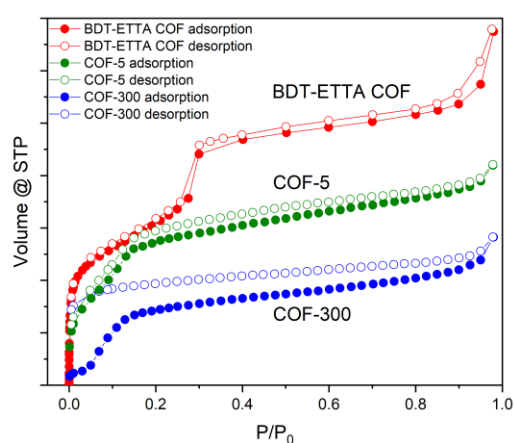

Figure S7: Nitrogen physisorption isotherms of scratched-off powder from the respective COF EPD films. Due to the low mass of the scratched-off powders, quantitative nitrogen uptake could not be accurately determined.

## Fourier-transform infrared spectroscopy

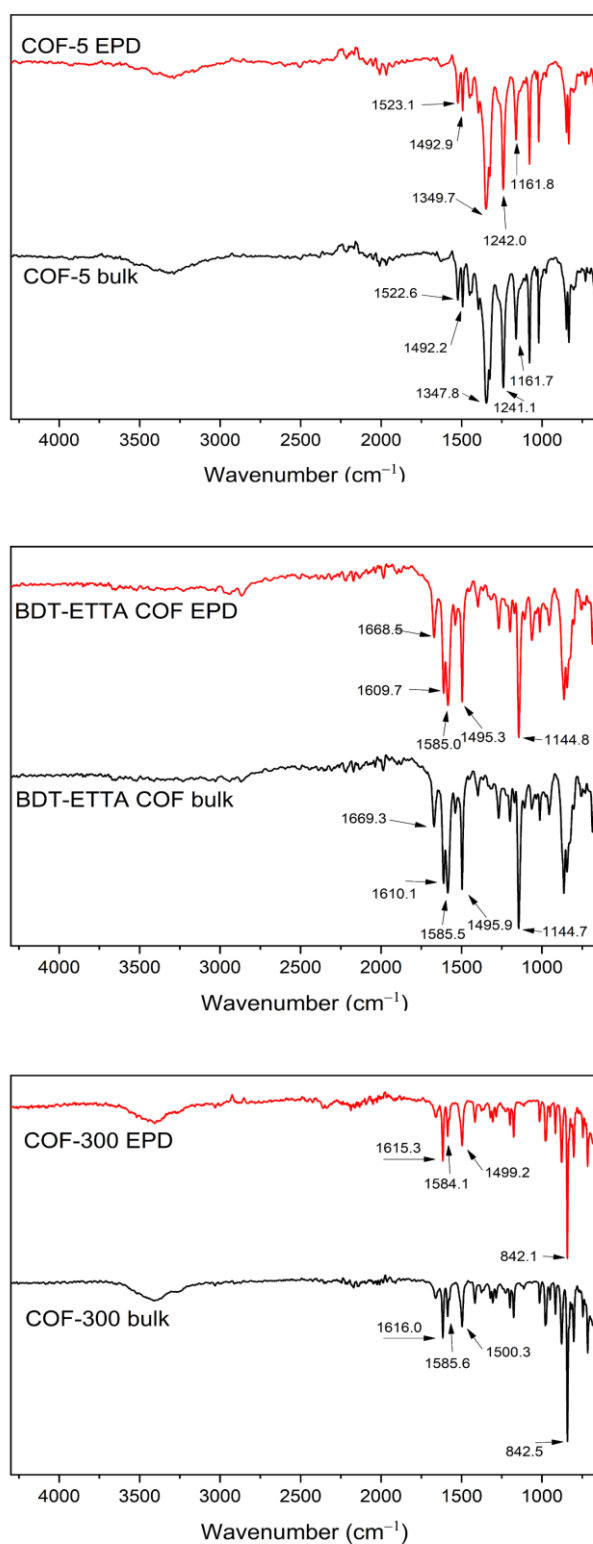

Figure S8: FT-IR spectra of the as-synthesized bulk material and as scratched-off EPD film materials. In all three cases IR vibrations are preserved. This indicates that no chemical degradation occurred during the EPD process.

## BDT-ETTA COF time-dependent thickness plot

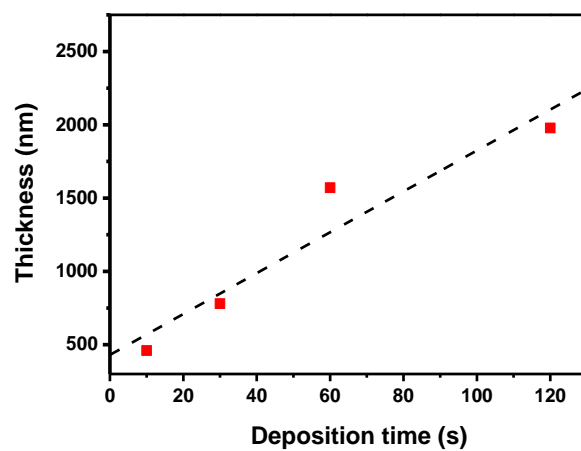

Figure S9: Time-dependent thickness plot of BDT-ETTA COF deposited from ethyl acetate at 900 V. Thicknesses obtained from SEM cross-sections.



## Voltage dependent deposition of BDT-ETTA COF

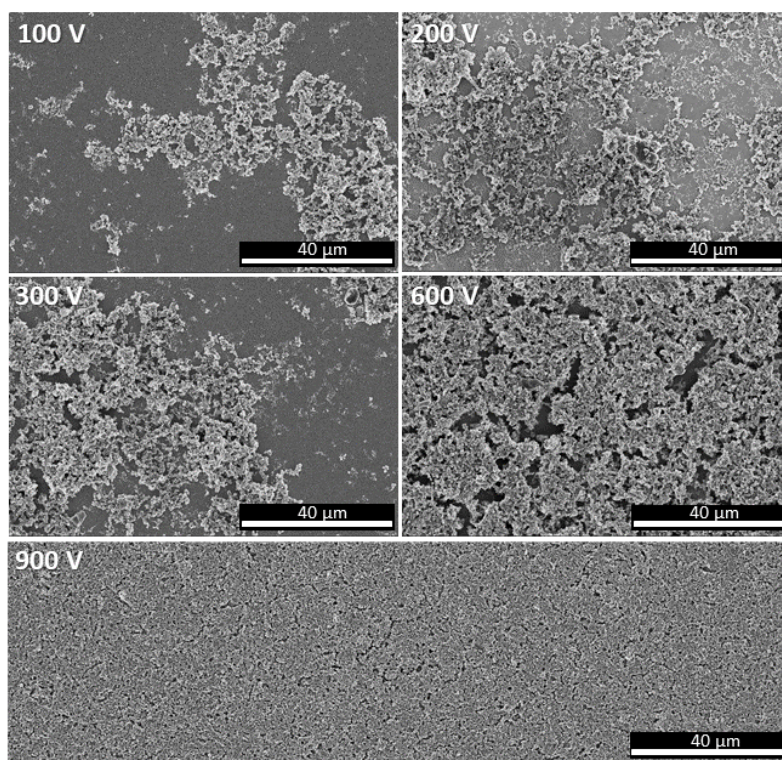

Figure S10: SEM top-view images of BDT-ETTA COF deposited at different voltages for 2 min from ethyl acetate.

## Mass-dependent deposition of COF-300

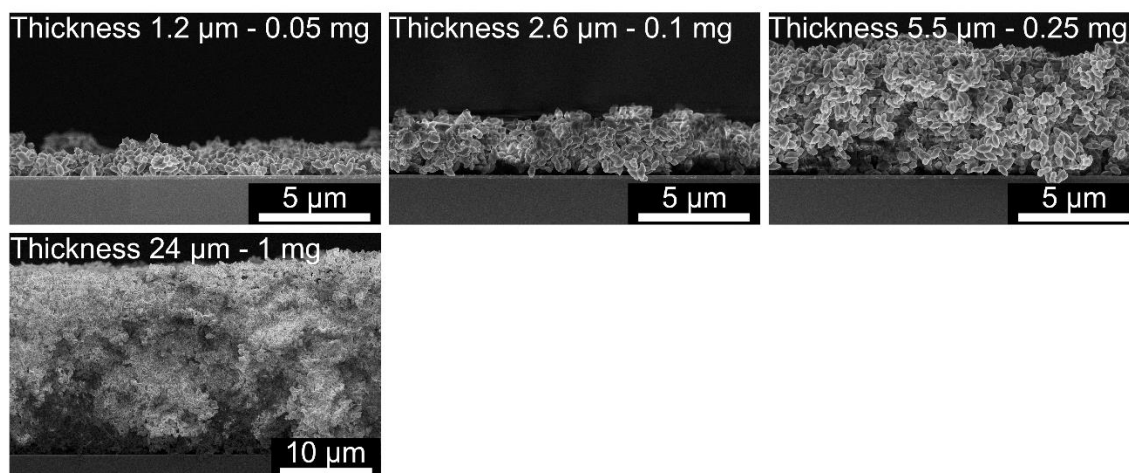

Figure S11: SEM cross-section images of depositions of COF-300 using different masses in 10 mL suspension and the resulting film thicknesses. Depositions were carried out at 900 V for 2 min from ethyl acetate.

## Large area deposition of BDT-ETTA COF

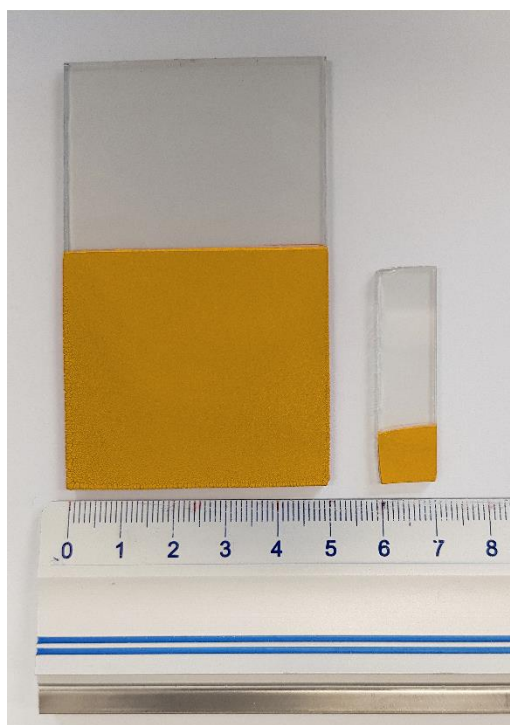

Figure S12: Photograph of an EPD of BDT-ETTA COF on  $5\text{ cm} \times 5\text{ cm}$  electrode area as well as a  $1\text{ cm} \times 1\text{ cm}$  film. Both depositions were carried out on FTO at 900 V for 2 min.

## SEM Micrographs of BDT-ETTA COF deposited on a porous mesh

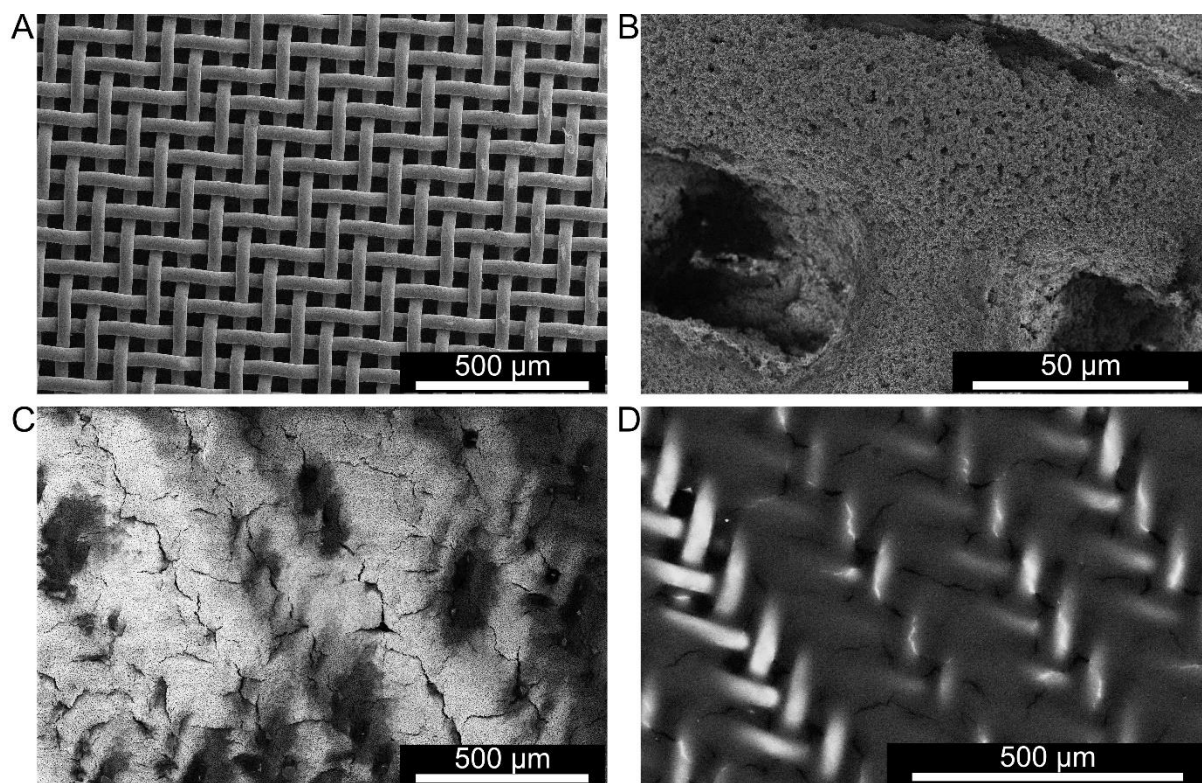

Figure S13: SEM top view micrographs of BDT-ETTA COF depositions on a porous steel mesh (mesh size 270). (A) Image of the bare mesh prior to deposition. (B) High magnification of BDT-ETTA COF particles deposited on the mesh. (C) Deposition of BDT-ETTA COF in high concentration on a steel mesh, revealing the complete coverage of the pores. (D) Corresponding back-scattered electron micrograph at 30 kV acceleration voltage, revealing the underlying mesh structure.

## Thickness dependent PEC current measurements and chronoamperometry

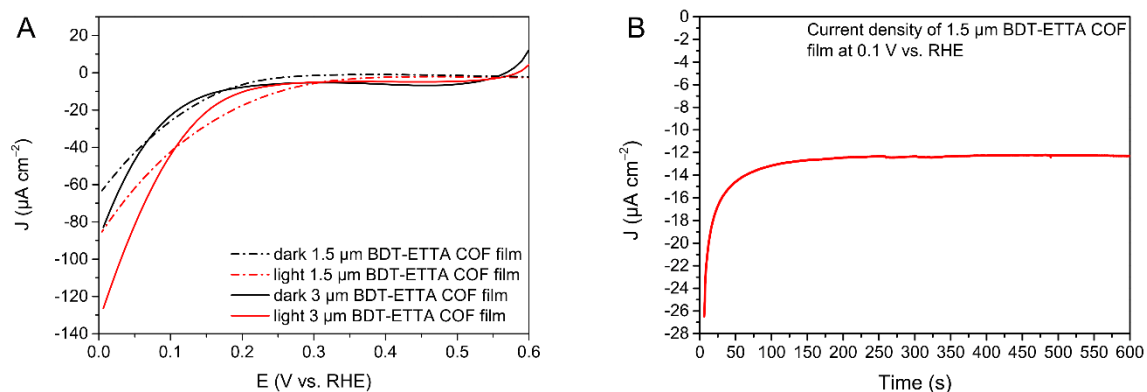

Figure S14: (A) Thickness dependent PEC linear sweep voltammograms of electrodes coated with BDT-ETTA COF. Illumination at AM1.5G. (B) Chronoamperometric current density measurement of BDT-ETTA COF under illumination.

## Stability of BDT-ETTA COF after PEC catalysis

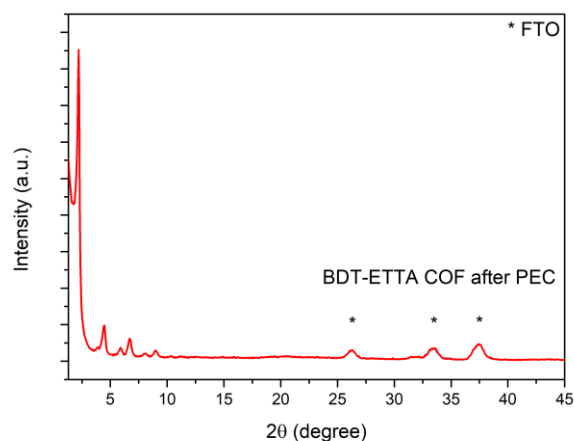

Figure S15: Stability of BDT-ETTA COF after 30 minutes of chopped illumination at 0.1 V vs. RHE.



## Pt nanoparticles size characterization

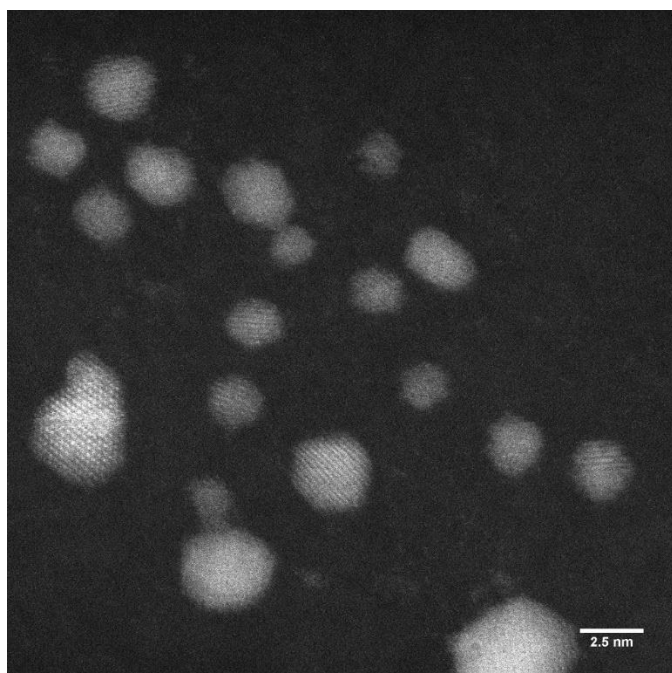

Figure S16: TEM micrograph of Pt nanoparticles after lyophilization.

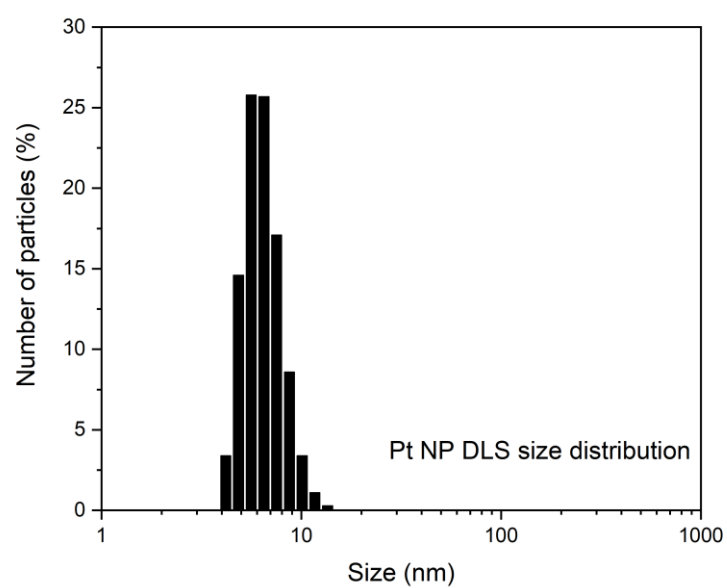

Figure S17: DLS profile of Pt nanoparticles after lyophilization.
